# Supplementary material for: Core–rim structure evolution and electric properties of Ca–Mg–Dy-co-doped BaTiO3 ceramics
Source: Royal Society of Chemistry journal article supplement (doi:10.1039/d3tc00097d), 2023-01-01
Supplement: d3tc00097d1.pdf [file d3tc00097d1.pdf]

## Supplementary Informations:

### Core-rim Structure Evolution and Electric Properties of Ca-Mg-Dy Co-doped BaTiO<sub>3</sub> Ceramics

Jiayan Huang<sup>a</sup>, Ran Chen<sup>a</sup>, Juanjuan Xing<sup>a\*</sup>, Faqiang Zhang<sup>b\*</sup>, Ying Jiang<sup>c</sup>, Yan Gu<sup>b</sup>, Hui Gu<sup>a</sup>

a. School of Materials Science and Engineering, Shanghai University 200444, PR China

b. Key Laboratory of Inorganic Functional Materials and Devices, Shanghai Institute of Ceramics, Chinese Academy of Sciences 200052, PR China

c. Materials Institute of Genome · Shanghai University 200444, PR China

\* Corresponding authors: l: xingjuanjuan@shu.edu.cn; zhangfq@mail.sic.ac.cn;

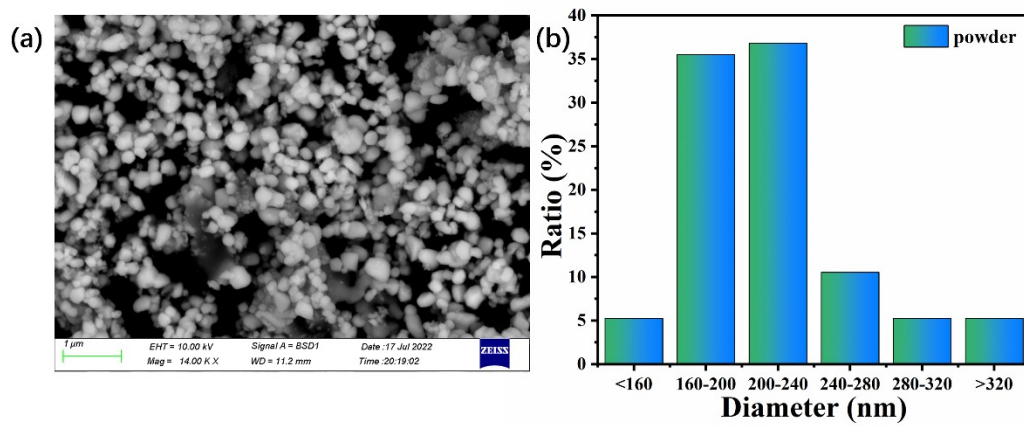

Figure S-1 (a) the BSE image of the raw BT powders and (b) the powder size distribution.

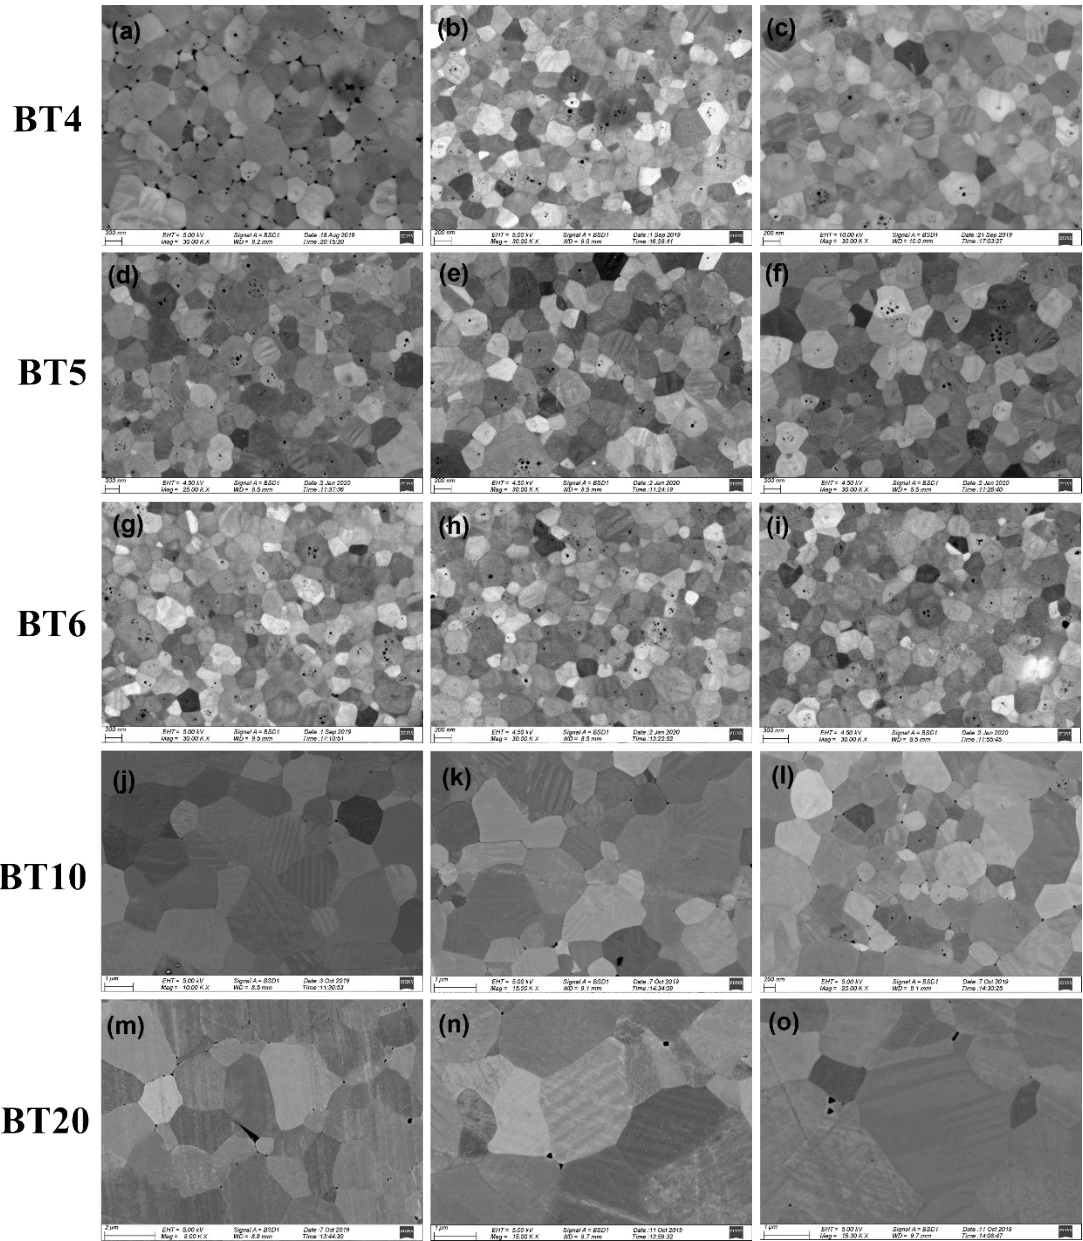

Figure S-2 BSE images of (a-c) BT4, (d-f) BT5, (g-i) BT6, (j-l) BT10, and (m-o) BT20 ceramics.

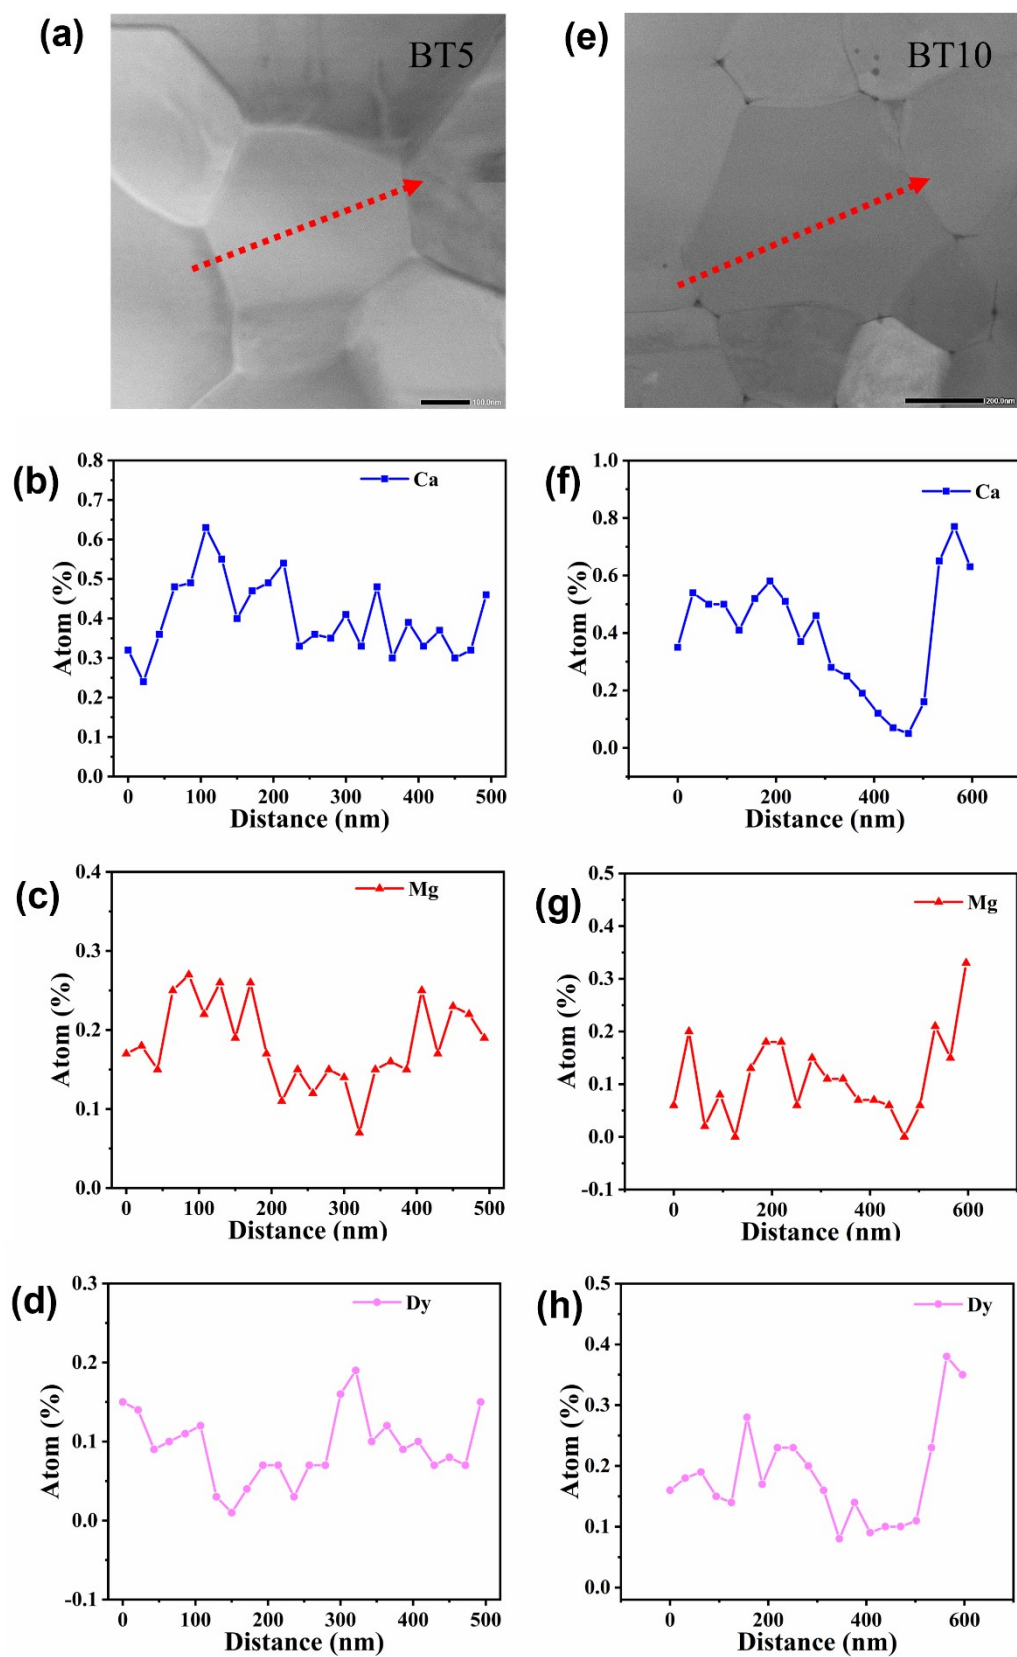

Figure S-3 The TEM images of the core-rim structured grain in (a)BT5 and (e)BT10 ceramics and their

EDS line scanning results of (b, f) Ca element, (c, g) Mg element, and (d, h) Dy element, respectively.

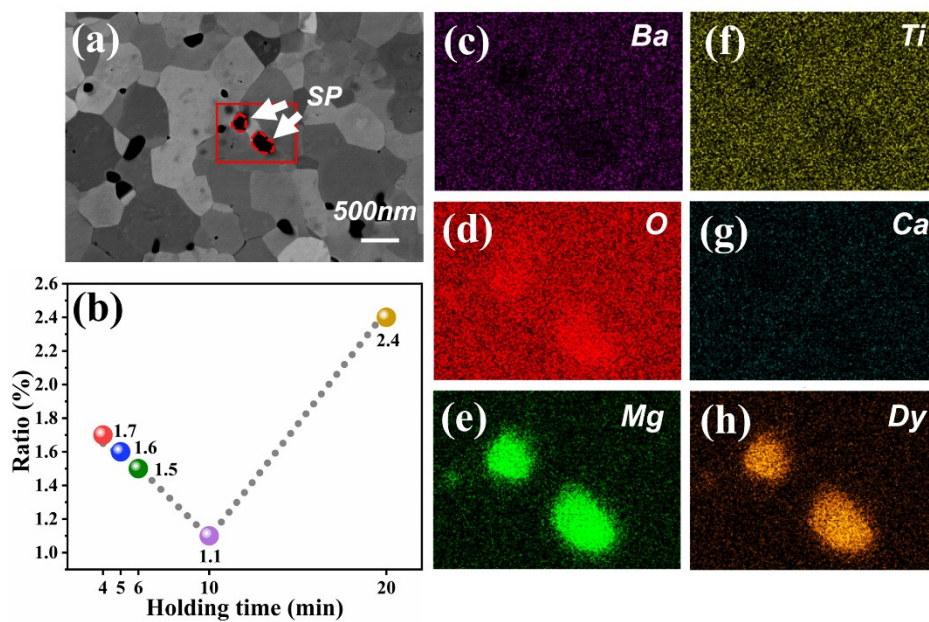

Figure S-4 (a) The BSE image of the secondary phase outlined by red dotted line and elemental mapping of (c) Ba, (d) O, (e) Mg, (f) Ti, (g) Ca, and (h) Dy in the sample BT5. (b) The ratio of second phase in BT samples.
